# Supplementary material for: Optimized Sulfonated Poly(Ether Ether Ketone) Membranes for In-House Produced Small-Sized Vanadium Redox Flow Battery Set-Up
Source: MDPI journal article supplement (doi:10.3390/membranes14080176), 2024-08-14
Supplement: s1 [file membranes-3138242-supplementary.pdf › membranes-3138242-supplementary.pdf]

Supplementary Information

# Optimized Sulfonated Poly(Ether Ether Ketone) Membranes for In-House Produced Small-Sized Vanadium Redox-Flow Battery Set-up

Antonino Rizzuti <sup>1,\*</sup>, Elena Dilonardo <sup>1,2,\*</sup>, Gennaro Cozzolino <sup>3</sup>, Fabio Matera <sup>4</sup>, Alessandra Carbone <sup>5</sup>, Biagia Musio <sup>1</sup>, and Piero Mastrorilli <sup>1,\*</sup>

<sup>1</sup> Department of Civil, Environmental, Land, Building and Chemical Engineering (DICATECh), Politecnico di Bari, Via E. Orabona 4, 70125, Bari (BA), Italy.

<sup>2</sup> Institute of Nanotechnology, CNR-NANOTEC, Via G. Amendola, 122, 70125, Bari (BA), Italy.

<sup>3</sup> InResLab, Via Baione, 70043, Monopoli (BA), Italy.

<sup>4</sup> Institute of Microelectronics and Microsystems, CNR- IMM, Catania HQ, VIII strada n. 5, 95100, Zona Industriale – Catania (CT), Italy.

<sup>5</sup> Institute for Advanced Energy Technologies, CNR-ITAE, Salita S. Lucia Sopra Contesse 5, 98126, Messina (ME), Italy.

\* Correspondence: antonino.rizzuti@poliba.it (A. R.); elena.dilonardo@cnr.it (E. D.); piero.mastrorilli@poliba.it (P. M.)

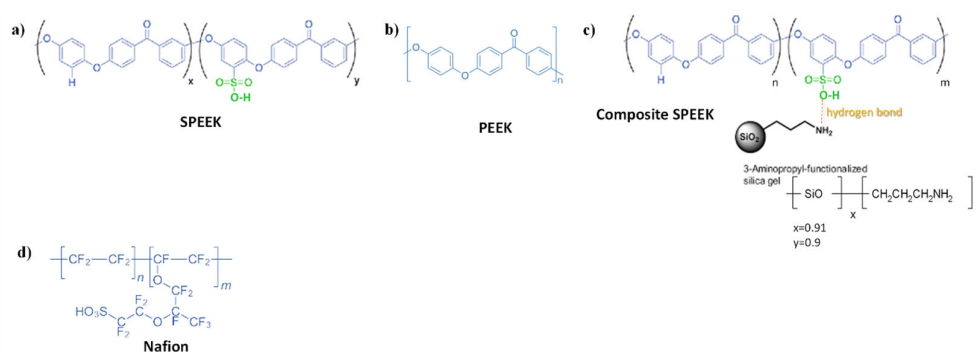

**Figure S1.** Chemical structures of (a) Nafion, (b) PEEK, (c) SPEEK, and (d) composited SPEEK.

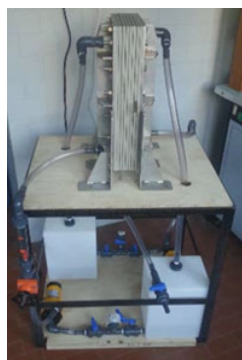

**Figure S2.** The in-house VRFB five-cell stack.

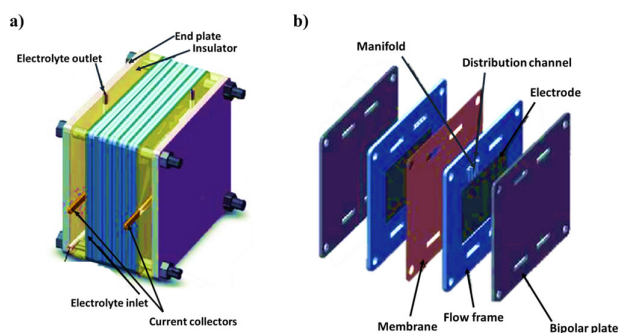

**Figure S3.** (a) Scheme of the five-cell VRFB stack; (b) exploded view of a single cell VRFB.

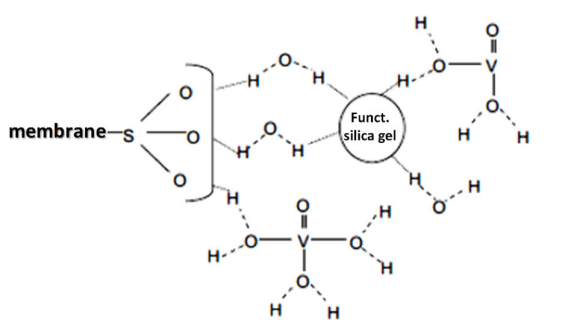

**Figure S4.** Possible interactions involved in the vanadium uptake process; dotted lines represent hydrogen bonding.

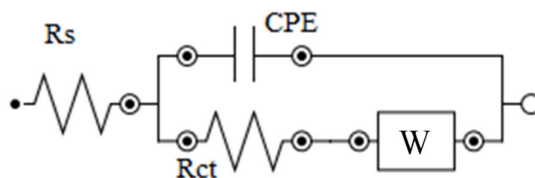

**Figure S5.** The proposed model of the equivalent electric circuit for the single cell VRFB.

**Table S1.** Charge-discharge performances parameters of evaluated single-cell VRFB configurations.

| Configurations | Current Density<br>(mA cm <sup>-2</sup> ) | Charge Cycle Time (h) | Discharge Cycle Time (h) | Mean Charge Voltage (V) | Mean Discharge Voltage (V) | Coulombic Efficiency (%) |
|----------------|-------------------------------------------|-----------------------|--------------------------|-------------------------|----------------------------|--------------------------|
| OPT-Nafion115  | 20                                        | 9.48                  | 8.42                     | 1.52                    | 1.21                       | 88.9                     |
|                | 40                                        | 4.47                  | 4.09                     | 1.51                    | 1.09                       | 91.7                     |
|                | 60                                        | 2.67                  | 2.37                     | 1.72                    | 0.98                       | 88.7                     |
|                | 80                                        | 1.41                  | 1.10                     | 1.83                    | 0.86                       | 77.9                     |
|                | 100                                       | -                     | -                        | -                       | -                          | -                        |
| OPT-SPEEK50_0  | 20                                        | 8.96                  | 8.38                     | 1.44                    | 1.19                       | 93.4                     |
|                | 40                                        | 4.20                  | 4.02                     | 1.65                    | 1.07                       | 95.8                     |
|                | 60                                        | 2.66                  | 2.56                     | 1.72                    | 0.97                       | 96.3                     |
|                | 80                                        | 1.86                  | 1.76                     | 1.79                    | 0.89                       | 95.2                     |
|                | 100                                       | 1.22                  | 1.10                     | 1.83                    | 0.82                       | 89.9                     |

---

**Disclaimer/Publisher's Note:** The statements, opinions and data contained in all publications are solely those of the individual author(s) and contributor(s) and not of MDPI and/or the editor(s). MDPI and/or the editor(s) disclaim responsibility for any injury to people or property resulting from any ideas, methods, instructions or products referred to in the content.
